# Supplementary material for: Profiling changes to natively-bound metals during Caenorhabditis elegans development
Source: Royal Society of Chemistry journal article supplement (doi:10.1039/c6ra22084c), 2016-01-01
Supplement: c6ra22084c1.pdf [file c6ra22084c1.pdf]

**Supplementary Information for:**

**Profiling changes to natively-bound metals during *Caenorhabditis elegans* development**

*Dominic J. Hare<sup>1,2†</sup>, Blaine R. Roberts<sup>2†</sup> and Gawain McColl<sup>2\*</sup>*

<sup>1</sup> *Elemental Bio-imaging Facility, University of Technology Sydney, Broadway, New South Wales, 2007, Australia*

<sup>2</sup> *The Florey Institute of Neuroscience and Mental Health, The University of Melbourne, Parkville, Victoria, 3052, Australia*

<sup>†</sup> *These authors contributed equally*

*Correspondence to:*

*Gawain McColl*

*gawain.mccoll@florey.edu.au; Ph. +61 3 903 56608; Fax. +61 3 9035 3107*

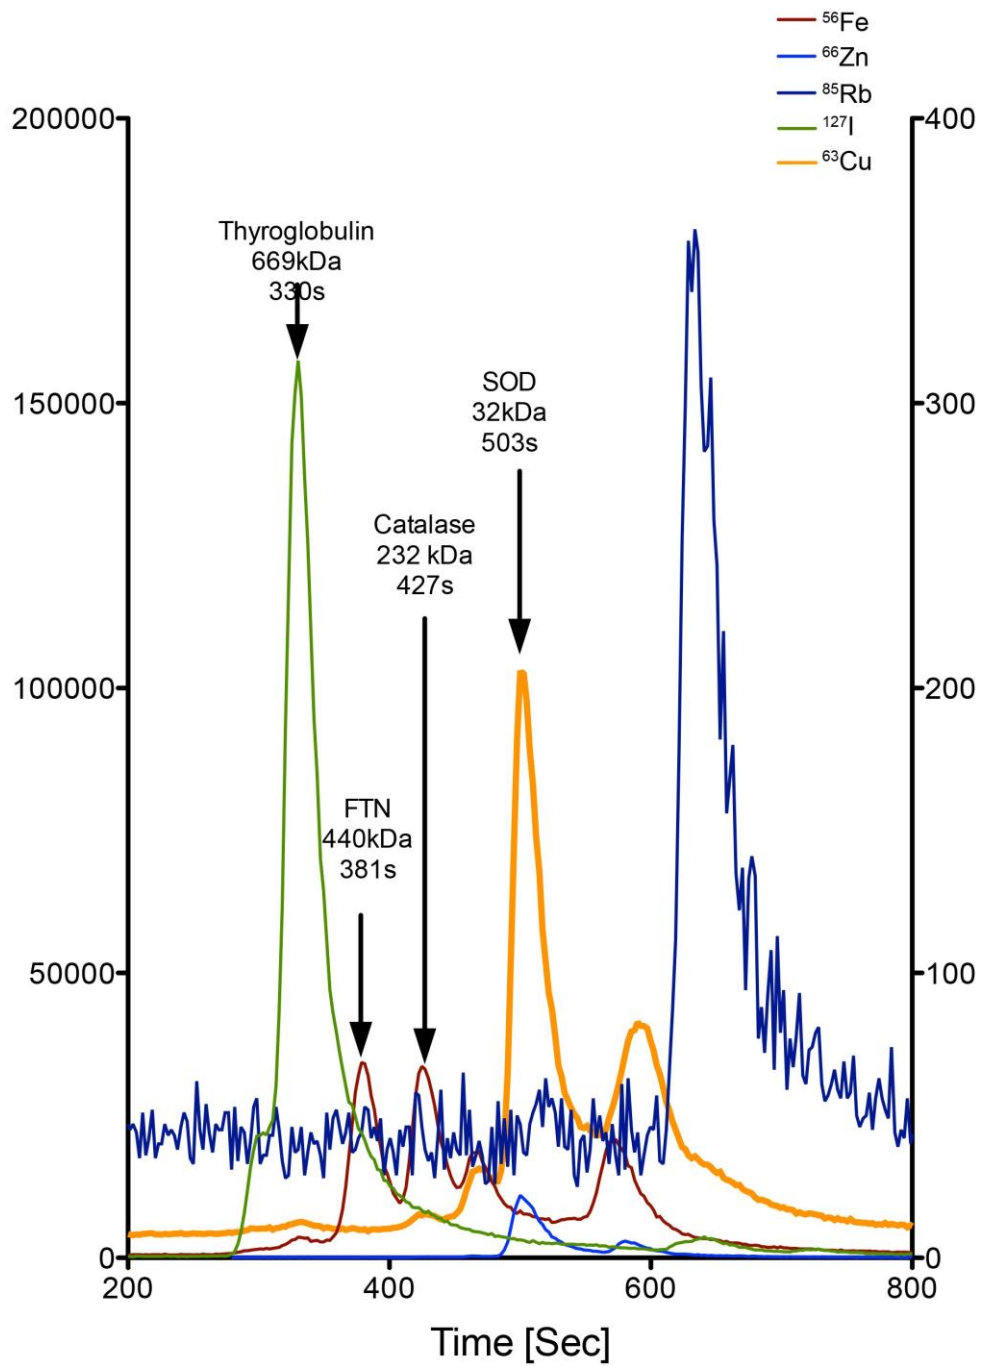

**Supplementary Figure 1:** Molecular weight calibration trace for SEC-ICP-MS for Agilent BioSEC5 column.

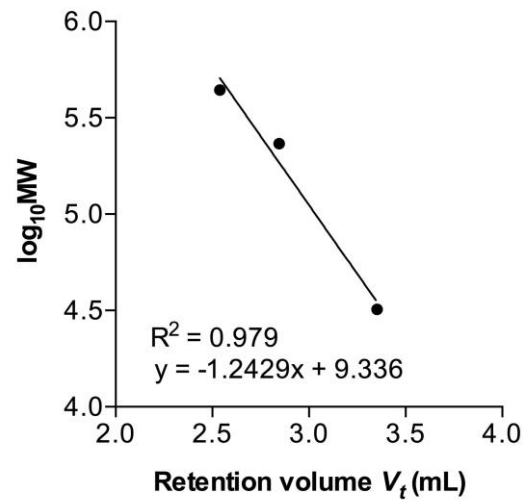

**Supplementary Figure 2:** Molecular weight calibration curve for Agilent BioSEC5 column using ferritin, catalase and SOD1 retention volumes from Supplementary Figure 1.

**Supplementary Table 1:** Total metal levels per mg of protein, determined by integration of total area under the curve for iron, copper and zinc and quantified using injected metalloprotein standards. <sup>a</sup> Calculated area under the curve below limit of detection, indicative only.

| <b>Developmental stage</b> | <b>Fe (pg mg<sup>-1</sup> protein)<sup>a</sup></b> | <b>Cu (pg mg<sup>-1</sup> protein)</b> | <b>Zn (pg mg<sup>-1</sup> protein)<sup>a</sup></b> |
|----------------------------|----------------------------------------------------|----------------------------------------|----------------------------------------------------|
| <i>Eggs</i>                | 364.0                                              | 52.95                                  | 9.146                                              |
| <i>L1</i>                  | 440.4                                              | 25.35                                  | 5.332                                              |
| <i>L2</i>                  | 700.4                                              | 28.82                                  | 5.794                                              |
| <i>L3</i>                  | 447.7                                              | 24.89                                  | 3.919                                              |
| <i>L4</i>                  | 472.0                                              | 31.17                                  | 4.539                                              |
| <i>Young adult</i>         | 785.6                                              | 36.28                                  | 7.529                                              |
